# Supplementary material for: Dimethylcyclosiloxanes in Mobile Smart Terminal Devices: Concentrations, Distributions, Profiles, and Environmental Emissions
Source: MDPI journal article supplement (doi:10.3390/toxics12040287), 2024-04-13
Supplement: s1 [file s1]

## **Supplementary Materials**

### **Dimethylcyclsiloxanes in mobile smart terminal devices: concentrations, distributions, profiles, and environmental emissions**

Yuanna Xing <sup>a,c</sup>, Yiming, Ge <sup>b</sup>, Shaoyou Lu <sup>b</sup>, Xianzhi Peng <sup>a,c\*</sup>

<sup>a</sup> Guangzhou Institute of Geochemistry, Chinese Academy of Sciences, Guangzhou, 510640, China

<sup>b</sup> School of Public Health (Shenzhen), Shenzhen Campus of SunYat-sen University, Shenzhen, 518107, China

<sup>c</sup> University of Chinese Academy of Sciences, Beijing, 100049, China

**\*Corresponding author:** pengx@gig.ac.cn (X Peng)

**Table S1** Retention times, qualitative ions, quantitative ions and ion-pair ratios of DMCs

| Analytes | Retention time<br>(min) | Qualitative ion<br>(m/z) | Quantitative ion<br>(m/z) | Ion-pair ratio<br>(%) |
|----------|-------------------------|--------------------------|---------------------------|-----------------------|
| D3       | 5.159                   | 207                      | 96                        | 11.74                 |
| D4       | 7.540                   | 281                      | 265                       | 13.64                 |
| D5       | 9.038                   | 355                      | 267                       | 98                    |
| D6       | 10.990                  | 341                      | 429                       | 43.8                  |
| D7       | 12.480                  | 281                      | 327                       | 42.7                  |
| D8       | 13.800                  | 355                      | 281                       | 29.2                  |
| D9       | 14.934                  | 429                      | 355                       | 54.7                  |

**Table S2** The standard curve, regression coefficients ( $R^2$ ), and limit of quantitation of each analyte

| Analytes | Standard curve    | $R^2$  | LOQ (mg/kg) |
|----------|-------------------|--------|-------------|
| D3       | $y=46874x+71732$  | 0.9993 | 1           |
| D4       | $y=449965x+41868$ | 0.9994 | 1           |
| D5       | $y=208802x+14271$ | 0.9994 | 1           |
| D6       | $y=285114x+16653$ | 0.9996 | 1           |
| D7       | $y=233099x+12163$ | 0.9997 | 1           |
| D8       | $y=236203x+15366$ | 0.9997 | 1           |
| D9       | $y=179769x+11016$ | 0.9997 | 1           |
